# Supplementary material for: Disturbed Plasma Lipidomic Profiles in Females with Diffuse Large B-Cell Lymphoma: A Pilot Study
Source: MDPI journal article supplement (doi:10.3390/cancers15143653), 2023-07-18
Supplement: s1 [file s1]

## **SUPPLEMENTARY FILE 2**

**For the manuscript:**

### **DISTURBED PLASMA LIPIDOMIC PROFILES IN FEMALES WITH DIFFUSE LARGE B-CELL LYMPHOMA: A PILOT STUDY**

Romana Masnikosa<sup>1\*</sup>, David Pirić<sup>1</sup>, Julia Maria Post<sup>2</sup>, Zorica Cvetković<sup>3,4</sup>, Snježana Petrović<sup>5</sup>,  
Marija Paunović<sup>5</sup>, Vesna Vučić<sup>5</sup>, Laura Bindila<sup>2\*</sup>

1 Department of Physical Chemistry, Vinca Institute of Nuclear Sciences – National Institute of the Republic of Serbia, University of Belgrade, Mike Petrovica Alasa 12-14, 11001 Belgrade, Republic of Serbia

2 Clinical Lipidomics Unit, Institute of Physiological Chemistry, University Medical Center, Duesbergweg 6, 55128 Mainz, Germany

3 Department of Haematology, Clinical Hospital Center Zemun, Vukova 9, 11080 Belgrade, Republic of Serbia

4 Faculty of Medicine, University of Belgrade, Dr Subotića 8, 11000 Belgrade, Republic of Serbia

5 Group for Nutritional Biochemistry and Dietology, Centre of Research Excellence in Nutrition and Metabolism, Institute for Medical Research, National Institute of the Republic of Serbia, University of Belgrade, Tadeusa Kosciuska 1, 11000 Belgrade, Republic of Serbia

\*Corresponding authors: Dr Laura Bindila. email: [bindila@uni-mainz.de](mailto:bindila@uni-mainz.de) phone: +4961313925794, fax: +4961313923536, and dr Romana Masnikosa, e-mail: [romana@vin.bg.ac.rs](mailto:romana@vin.bg.ac.rs), phone +38162436343

**Table S1.** Calibration standards used for the quantification of 35 plasma lipid species by LC-MRM

|    | abbreviation | lipid species                                 | Target conc. range (ng/mL) |
|----|--------------|-----------------------------------------------|----------------------------|
| 1  | AA           | arachidonic acid FA 20:4                      | 160 – 6400                 |
| 2  | TxB2         | thromboxane B2                                | 0.2 - 8                    |
| 3  | 5(S)-HETE    | 5S-hidroxyeicosatetraenoic acid               | 0.4 - 16                   |
| 4  | 8(S)-HETE    | 8S-hidroxyeicosatetraenoic acid               | 0.4 - 16                   |
| 5  | 12(S)-HETE   | 12S-hidroxyeicosatetraenoic acid              | 0.4 - 16                   |
| 6  | 15(S)-HETE   | 15S-hidroxyeicosatetraenoic acid              | 0.4 - 16                   |
| 7  | 20-HETE      | 20-hidroxyeicosatetraenoic acid               | 0.2 - 8                    |
| 8  | 5(6)-DiHET   | 5,6-dihidroxy-8Z,11Z,14Z-eicosatrienoic acid  | 0.4 - 16                   |
| 9  | 8(9)-DiHET   | 8,9-dihidroxy-5Z,11Z,14Z-eicosatrienoic acid  | 0.4 - 16                   |
| 10 | 11(12)-DiHET | 11,12-dihidroxy-5Z,8Z,14Z-eicosatrienoic acid | 0.4 - 16                   |
| 11 | 14(15)-DiHET | 14,15-dihidroxy-5Z,8Z,11Z-eicosatrienoic acid | 0.4 - 16                   |
| 12 | RvD1         | resolvin D1                                   | 0.2 - 8                    |
| 13 | LPC 18:0     | lysophosphatidylcholine 18:0/0:0              | 50 - 3200                  |
| 14 | PC 34:1      | phosphatidylcholine 16:0/18:1                 | 175 - 11200                |
| 15 | PE 34:1      | phosphatidylethanolamine 16:0/18:1            | 25 - 1600                  |
| 16 | PG 34:1      | phosphatidylglycerol 16:0/18:1                | 1.25 - 80                  |
| 17 | PI 34:1      | phosphatidylinositol 16:0/18:1                | 12.5 - 800                 |
| 18 | PS 34:1      | phosphatidylserine 16:0/18:1                  | 5 - 320                    |
| 19 | PA 34:1      | phosphatidic acid 16:0/18:1                   | 25 - 1600                  |
| 20 | LPA 16:0     | lysophosphatidic acid 16:0/0:0                | 1 - 64                     |
| 21 | SM 36:1      | sphingomyelin SM d18:1/18:0                   | 125 - 8000                 |
| 22 | SPH 18       | sphingosine d18:1                             | 22.5 - 1440                |
| 23 | S1P          | sphingosine-1-phosphate d18:1                 | 10 - 640                   |
| 24 | LA           | linoleic acid; FA 18:2                        | 250 - 16000                |
| 25 | EPA          | eicosapentaenoic acid; FA 20:5n-3             | 6.25 - 400                 |
| 26 | DHA          | docosahexaenoic acid; FA 22:6n-3              | 50 – 3200                  |

**Table S2.** Internal standards (ISTDs) used for the quantification of 35 plasma lipid species by LC-MRM

| ISTD             | target concentration<br>[pmol/mL] |
|------------------|-----------------------------------|
| AA-d8            | 5120                              |
| TxB2-d4          | 5.34                              |
| 5(S)-HETE-d8     | 12.48                             |
| 12(S)-HETE-d8    | 12.48                             |
| 20-HETE-d6       | 6.24                              |
| 11(12)-DiHET-d11 | 11.44                             |
| RvD1-d5          | 5.24                              |
| LPC 17:0_0:0     | 98.1                              |
| LPA 17:0_0:0     | 58.9                              |
| PC 17:0/14:1     | 104.5                             |
| PE 17:0/14:1     | 111.0                             |
| PG 17:0/14:1     | 70.7                              |
| PI 17:0/14:1     | 62.9                              |
| PS 17:0/14:1     | 67.8                              |
| PA 17:0/14:1     | 118.5                             |
| SM d18:1/12:0    | 77.3                              |
| SPH d17:1        | 350.3                             |
| S1P d17:1        | 273.6                             |
| LA-d4            | 1757                              |
| EPA-d5           | 162.6                             |
| DHA-d5           | 149.9                             |

**Table S3.** Measured plasma lipid species (absolute quantification)

|    | Abbreviation                | lipid species                                                         | mean conc.     |
|----|-----------------------------|-----------------------------------------------------------------------|----------------|
| 1  | <b>AA</b>                   | arachidonic acid; 5Z,8Z,11Z,14Z-eicosatetraenoic acid; FA 20:4        | 2.86 nmol/mL   |
| 2  | <b>TxB2</b>                 | thromboxane B2; FA 20:3;O4                                            | 0.168 pmol/mL  |
| 3  | <b>5(S)-HETE</b>            | 5S-hydroxyeicosatetraenoic acid; FA 20:4;O                            | 0.304 pmol/mL  |
| 4  | <b>8(S)-HETE</b>            | 8S-hydroxyeicosatetraenoic acid; FA 20:4;O                            | 0.151 pmol/mL  |
| 5  | <b>12(S)-HETE</b>           | 12S-hydroxyeicosatetraenoic acid; FA 20:4;O                           | 0.514 pmol/mL  |
| 6  | <b>15(S)-HETE</b>           | 15S-hydroxyeicosatetraenoic acid; FA 20:4;O                           | 0.134 pmol/mL  |
| 7  | <b>20-HETE</b>              | 20-hydroxyeicosatetraenoic acid FA 20:4;O                             | 0.784 pmol/mL  |
| 8  | <b>5(6)-DiHET</b>           | 5,6-dihydroxy-8Z,11Z,14Z-eicosatrienoic acid; FA 20:3;O2              | 0.112 pmol/mL  |
| 9  | <b>8(9)-DiHET</b>           | 8,9-dihydroxy-5Z,11Z,14Z-eicosatrienoic acid; FA 20:3;O2              | 0.112 pmol/mL  |
| 10 | <b>11(12)-DiHET</b>         | 11,12-dihydroxy-5Z,8Z,14Z-eicosatrienoic acid; FA 20:3;O2             | 0.334 pmol/mL  |
| 11 | <b>14(15)-DiHET</b>         | 14,15-dihydroxy-5Z,8Z,11Z-eicosatrienoic acid; FA 20:3;O2             | 0.388 pmol/mL  |
| 12 | <b>RvD1</b>                 | resolvin D1; FA 22:6;O3                                               | 29.45 fmol/mL  |
| 13 | <b>LPC 18:0</b>             | 18:0 monoacylglycerophosphocholine; 18:0 lyso-glycerophosphocholine   | 17.25 nmol/mL  |
| 14 | <b>LPC 20:4</b>             | 20:4 monoacylglycerophosphocholine; 20:4 lyso-glycerophosphocholine   | 0.774 nmol/mL  |
| 15 | <b>PC 34:1</b> (16:0_18:1)  | 34:1 diacylglycerophosphocholine                                      | 127.44 nmol/mL |
| 16 | <b>PC 38:4</b> (18:0_20:4)  | 38:4 diacylglycerophosphocholine                                      | 60.12 nmol/mL  |
| 17 | <b>PC 38:6</b> (18:2_20:4)  | 38:6 diacylglycerophosphocholine                                      | 30.729 nmol/mL |
| 18 | <b>PC 40:4</b> (20:0_20:4)  | 40:4 diacylglycerophosphocholine                                      | 1.602 nmol/mL  |
| 19 | <b>PC 40:6</b> (20:2_20:4)  | 40:6 diacylglycerophosphocholine                                      | 9.044 nmol/mL  |
| 20 | <b>PE 34:1</b> (16:0_18:1)  | 34:1 diacylglycerophosphoethanolamine                                 | 1.566 nmol/mL  |
| 21 | <b>PE 38:4</b> (18:0_20:4)  | 38:4 diacylglycerophosphoethanolamine                                 | 0.205 nmol/mL  |
| 22 | <b>PE 38:6</b> (18:2_20:4)  | 38:6 diacylglycerophosphoethanolamine                                 | 0.093 nmol/mL  |
| 23 | <b>PG 34:1</b> (16:0_18:1)  | 34:1 diacylglycerophosphoglycerol                                     | 55.53 pmol/mL  |
| 24 | <b>LPI 20:4</b>             | 20:4 monoacylglycerophosphoinositol; 20:4 lyso-glycerophosphoinositol | 1.028 nmol/mL  |
| 25 | <b>PI 34:1</b> (16:0_18:1)  | 34:1 diacylglycerophosphoinositol                                     | 2.196 nmol/mL  |
| 26 | <b>PI 36:4</b> (16:0_20:4)  | 36:4 diacylglycerophosphoinositol                                     | 3.008 nmol/mL  |
| 27 | <b>PI 38:4</b> (18:0_20:4)  | 38:4 diacylglycerophosphoinositol                                     | 19.014 nmol/mL |
| 28 | <b>PS 38:4</b> (18:0_20:4)  | 38:4 diacylglycerophosphoserine                                       | 117.63 pmol/mL |
| 29 | <b>SM 34:1</b> (d18:1/16:0) | N-(hexadecanoyl)-sphing-4-enine-1-phosphocholine; SM 34:1;O2          | 37.27 nmol/mL  |
| 30 | <b>SM 36:1</b> (d18:1/18:0) | N-(octadecanoyl)-sphing-4-enine-1-phosphocholine; SM 36:1;O2          | 8.59 nmol/mL   |
| 31 | <b>SM 42:1</b> (d18:1/24:0) | N-(tetracosanoyl)-sphing-4-enine-1-phosphocholine; SM 42:1;O2         | 5.37 nmol/mL   |
| 32 | <b>SIP</b> (d18:1)          | sphingosine-1-phosphate; sphing-4-enine-1-phosphate; SPBP 18:1;O2     | 439.6 pmol/mL  |
| 33 | <b>LA</b>                   | linoleic acid; 9Z,12Z-octadecadienoic acid; FA 18:2                   | 69.49 nmol/mL  |
| 34 | <b>EPA</b>                  | 5Z,8Z,11Z,14Z,17Z-eicosapentaenoic acid; FA 20:5                      | 186.3 pmol/mL  |
| 35 | <b>DHA</b>                  | 4Z,7Z,10Z,13Z,16Z,19Z-docosahexaenoic acid; FA 22:6                   | 2.124 nmol/mL  |

Lipid species were measured in plasma samples of diffuse large B-cell lymphoma (DLBCL) patients and controls individuals (CTRL). Mean concentration (mean conc.) for all analytes was calculated (17 DLBCL + 21CTRL). Abbreviated lipid names are shown in red.

**Table S4.** Between-groups comparison of plasma lipid species: diffuse large B-cell lymphoma (DLBCL) female patients vs. healthy control females (CTRL). Thirty-five plasma lipid species were measured in DLBCL cohort (n=17) and CTRL cohort (n=21). Statistical tests used for the between-group comparisons are shown. p-values were two-tailed: \*\*\*\*p< 0.0001, \*\*\*p = 0.0001 to 0.001, \*\*p = 0.001 to 0.01, \*p = 0.01-0.05; ns, non-significant p ≥0.05. Fold change (FC) for each variable was calculated by dividing the mean concentration in the DLBCL group by the mean concentration in the CTRL group. Mean analyte concentrations in plasma of DLBCL patients are roughly equal (=), increased (↑) or decreased (↓), compared to CTRL.

| Lipid species | Test                                                    | p-value | Sig. | FC   | Trend |
|---------------|---------------------------------------------------------|---------|------|------|-------|
| AA            | Welch's t-test                                          | 0.4683  | ns   | 1.13 | ↑     |
| TxB2          | Mann-Whitney                                            | 0.0670  | ns   | 3.12 | ↑↑↑   |
| 5(S)-HETE     | Welch's t-test                                          | 0.0889  | ns   | 1.30 | ↑     |
| 8(S)-HETE     | Welch's t-test on log <sub>10</sub> -transformed data   | 0.4210  | ns   | 1.15 | ↑     |
| 12(S)-HETE    | Mann-Whitney                                            | 0.0031  | **   | 3.15 | ↑↑↑   |
| 15(S)-HETE    | Welch's t-test on log <sub>10</sub> -transformed data   | 0.0235  | *    | 1.45 | ↑     |
| 20-HETE       | Student's t-test on log <sub>10</sub> -transformed data | 0.0189  | *    | 1.45 | ↑     |
| 5(6)-DiHET    | Welch's t-test                                          | 0.0394  | *    | 1.37 | ↑     |
| 8(9)-DiHET    | Welch's t-test                                          | 0.4084  | ns   | 1.12 | ↑     |
| 11(12)-DiHET  | Welch's t-test on log <sub>10</sub> -transformed data   | 0.7199  | ns   | 1.01 | =     |
| 14(15)-DiHET  | Student's t-test on log <sub>10</sub> -transformed data | 0.7707  | ns   | 1.06 | ↑     |
| RvD1          | Welch's t-test                                          | 0.0481  | *    | 1.34 | ↑     |
| LPC 18:0      | Student's t-test                                        | 0.0920  | ns   | 0.91 | ↓     |
| LPC 20:4      | Student's t-test                                        | 0.3861  | ns   | 0.94 | ↓     |
| PC 34:1       | Mann-Whitney                                            | 0.6013  | ns   | 1.00 | =     |
| PC 38:4       | Welch's t-test                                          | 0.8317  | ns   | 0.98 | =     |
| PC38:6        | Mann-Whitney                                            | 0.1790  | ns   | 1.13 | ↑     |
| PC 40:4       | Student's t-test                                        | 0.1455  | ns   | 1.15 | ↑     |
| PC 40:6       | Student's t-test on log <sub>10</sub> -transformed data | 0.2031  | ns   | 1.15 | ↑     |
| PE 34:1       | Student's t-test                                        | 0.5652  | ns   | 1.09 | ↑     |
| PE 38:4       | Welch's t-test                                          | 0.2163  | ns   | 1.19 | ↑     |
| PE 38:6       | Student's t-test                                        | 0.0709  | ns   | 1.34 | ↑     |
| PG 34:1       | Student's t-test                                        | 0.4384  | ns   | 1.10 | ↑     |
| LPI 20:4      | Welch's t-test                                          | 0.0077  | **   | 1.51 | ↑     |
| PI 34:1       | Student's t-test                                        | 0.0015  | **   | 0.62 | ↓     |
| PI 36:4       | Student's t-test                                        | 0.9703  | ns   | 1.00 | =     |
| PI 38:4       | Student's t-test                                        | 0.8501  | ns   | 0.98 | =     |
| PS 38:4       | Mann-Whitney                                            | 0.0079  | **   | 1.49 | ↑     |
| SM 34:1       | Welch's t-test                                          | 0.0004  | ***  | 1.77 | ↑     |
| SM 36:1       | Welch's t-test on log <sub>10</sub> -transformed data   | 0.00008 | **** | 2.10 | ↑↑    |
| SM 42:1       | Welch's t-test                                          | 0.0589  | ns   | 1.25 | ↑     |

|     |                                                         |          |      |      |   |
|-----|---------------------------------------------------------|----------|------|------|---|
| S1P | Mann-Whitney                                            | 0.000002 | **** | 1.85 | ↑ |
| LA  | Mann-Whitney                                            | 0.0057   | **   | 1.46 | ↑ |
| EPA | Student's t-test on log <sub>10</sub> -transformed data | 0.1939   | ns   | 1.46 | ↑ |
| DHA | Student's t-test on log <sub>10</sub> -transformed data | 0.1574   | ns   | 1.44 | ↑ |

**Table S5.** Homogeneity of variance (heteroscedasticity) across DLBCL and control plasma samples

| Analyte      | Test                                   | p-value    | Sig. |
|--------------|----------------------------------------|------------|------|
| S1P          | Brown-Forsythe's test                  | 0.00000092 | **** |
| SM 34:1      | Bartlett's test                        | 0.000055   | **** |
| 5(S)-HETE    | Bartlett's test                        | 0.0005     | ***  |
| 5(6)-DiHET   | Bartlett's test                        | 0.0012     | **   |
| 15(S)-HETE   | Bartlett's test (log-transformed data) | 0.0013     | **   |
| LPI 20:4     | Bartlett's test                        | 0.0045     | **   |
| SM 36:1      | Bartlett's test (log-transformed data) | 0.009      | **   |
| PC 38:4      | Bartlett's test                        | 0.0104     | *    |
| 8(S)-HETE    | Bartlett's test (log-transformed data) | 0.0143     | *    |
| LA           | Brown-Forsythe's test                  | 0.016      | *    |
| 8(9)-DiHET   | Bartlett's test                        | 0.0223     | *    |
| 11(12)-DiHET | Bartlett's test (log-transformed data) | 0.0288     | *    |
| PS 38:4      | Brown-Forsythe's test                  | 0.0306     | *    |
| AA           | Bartlett's test                        | 0.0338     | *    |
| SM 42:1      | Bartlett's test                        | 0.0366     | *    |
| PE 38:4      | Bartlett's test                        | 0.0398     | *    |

Only heteroscedastic lipid variables are shown

**Table S6.** The summary of the principal component analysis (PCA) of the lipid dataset obtained through the targeted lipidomics (38 x 35)

| principal component                   | PC1   | PC2   | PC3   | PC4   | PC5   |
|---------------------------------------|-------|-------|-------|-------|-------|
| Eigenvalue                            | 7.244 | 5.236 | 4.592 | 3.268 | 2.582 |
| proportion of variance (%)            | 20.70 | 14.96 | 13.12 | 9.34  | 7.38  |
| cumulative proportion of variance (%) | 20.70 | 35.66 | 48.78 | 58.12 | 65.50 |

Table S7. Spearman correlations among measured plasma lipid species in DLBCL and CTRL cohorts.  $\rho$  is a Spearman's correlation coefficient,  $q$  is a BH-corrected p-value at a false discovery rate (FDR) of 5%; the significance of the  $q$ -value is shown (Sig.). Strong inter-lipid correlations in the DLBCL group that were moderate or non-significant in the CTRL are in italics.

**DLBCL group**

| Lipid_1             | Lipid_2          | P     | p-value              | q-value              | Sig. |
|---------------------|------------------|-------|----------------------|----------------------|------|
| PC 38:6             | PC 40:6          | 0.931 | $5.6 \times 10^{-8}$ | $3.4 \times 10^{-5}$ | **** |
| 11(12)-DiHET        | 14(15)-DiHET     | 0.907 | $5.2 \times 10^{-7}$ | 0.00015              | ***  |
| AA                  | 5(S)-HETE        | 0.886 | $2.2 \times 10^{-6}$ | 0.00044              | ***  |
| PI 34:1             | PI 36:4          | 0.878 | $3.7 \times 10^{-6}$ | 0.00055              | ***  |
| EPA                 | DHA              | 0.841 | $2.4 \times 10^{-5}$ | 0.0028               | **   |
| SM 34:1             | SM 36:1          | 0.836 | $2.9 \times 10^{-5}$ | 0.0029               | **   |
| AA                  | <i>8(S)-HETE</i> | 0.828 | 0.00004              | 0.0034               | **   |
| LA                  | <i>DHA</i>       | 0.782 | 0.00021              | 0.0156               | *    |
| 5(S)-HETE           | <i>8(S)-HETE</i> | 0.777 | 0.00025              | 0.0162               | *    |
| SM 36:1             | SM 42:1          | 0.762 | 0.00037              | 0.0223               | *    |
| AA                  | <i>EPA</i>       | 0.752 | 0.00049              | 0.0266               | *    |
| <i>PC 38:4</i>      | <i>PC 40:6</i>   | 0.740 | 0.00068              | 0.0337               | *    |
| <i>11(12)-DiHET</i> | <i>DHA</i>       | 0.728 | 0.00092              | 0.0423               | *    |
| <i>PC 40:6</i>      | <i>PE 38:6</i>   | 0.719 | 0.0012               | 0.0491               | *    |

**CTRL group**

| Lipid_1      | Lipid_2      | P      | p-value               | q-value              | Sig. |
|--------------|--------------|--------|-----------------------|----------------------|------|
| 11(12)-DiHET | 14(15)-DiHET | 0.933  | $7.3 \times 10^{-10}$ | $4.4 \times 10^{-7}$ | **** |
| PE 38:4      | PG 34:1      | 0.918  | $4.5 \times 10^{-9}$  | $1.3 \times 10^{-6}$ | **** |
| PC 38:6      | PC 40:6      | 0.912  | $9 \times 10^{-9}$    | $1.8 \times 10^{-6}$ | **** |
| 8(S)-HETE    | 15(S)-HETE   | 0.881  | $1.3 \times 10^{-7}$  | 0.00002              | **** |
| PI 36:4      | PI 38:4      | 0.851  | $1 \times 10^{-6}$    | 0.00012              | ***  |
| SM 34:1      | SM 42:1      | 0.847  | $1.3 \times 10^{-6}$  | 0.00012              | ***  |
| SM 34:1      | SM 36:1      | 0.846  | $1.4 \times 10^{-6}$  | 0.00012              | ***  |
| PE 34:1      | PG 34:1      | 0.829  | $3.5 \times 10^{-6}$  | 0.00026              | ***  |
| PC 38:6      | DHA          | 0.812  | $7.9 \times 10^{-6}$  | 0.00052              | ***  |
| EPA          | DHA          | 0.797  | $1.5 \times 10^{-5}$  | 0.00085              | ***  |
| AA           | 5(S)-HETE    | 0.796  | $1.6 \times 10^{-5}$  | 0.00085              | ***  |
| PC 40:6      | DHA          | 0.793  | $1.8 \times 10^{-5}$  | 0.00089              | ***  |
| PI 34:1      | PI 36:4      | 0.760  | $6.5 \times 10^{-5}$  | 0.0030               | **   |
| PE 34:1      | PE 38:4      | 0.748  | $9.7 \times 10^{-5}$  | 0.0041               | **   |
| 8(9)-DiHET   | 14(15)-DiHET | 0.702  | 0.00039               | 0.0154               | *    |
| AA           | S1P          | -0.700 | 0.00043               | 0.0158               | *    |
| 5(S)-HETE    | LA           | 0.693  | 0.0005                | 0.0175               | *    |
| PI 34:1      | PI 38:4      | 0.686  | 0.0006                | 0.0199               | *    |
| AA           | LA           | 0.672  | 0.00086               | 0.0256               | *    |
| SM 36:1      | SM 42:1      | 0.671  | 0.00086               | 0.0256               | *    |
| PC 40:6      | EPA          | 0.665  | 0.001                 | 0.0285               | *    |
| 8(9)-DiHET   | 11(12)-DiHET | 0.659  | 0.0012                | 0.0298               | *    |
| S1P          | LA           | -0.660 | 0.0012                | 0.0298               | *    |
| 12(S)-HETE   | PI 38:4      | 0.657  | 0.0012                | 0.0298               | *    |
| 5(S)-HETE    | 8(S)-HETE    | 0.649  | 0.0015                | 0.0346               | *    |
| 12(S)-HETE   | PI 36:4      | 0.637  | 0.0019                | 0.0433               | *    |
| 8(S)-HETE    | 8(9)-DiHET   | 0.634  | 0.002                 | 0.0433               | *    |
| PC 38:6      | EPA          | 0.634  | 0.002                 | 0.0433               | *    |
| 5(6)-DiHET   | 11(12)-DiHET | 0.629  | 0.0023                | 0.0433               | *    |

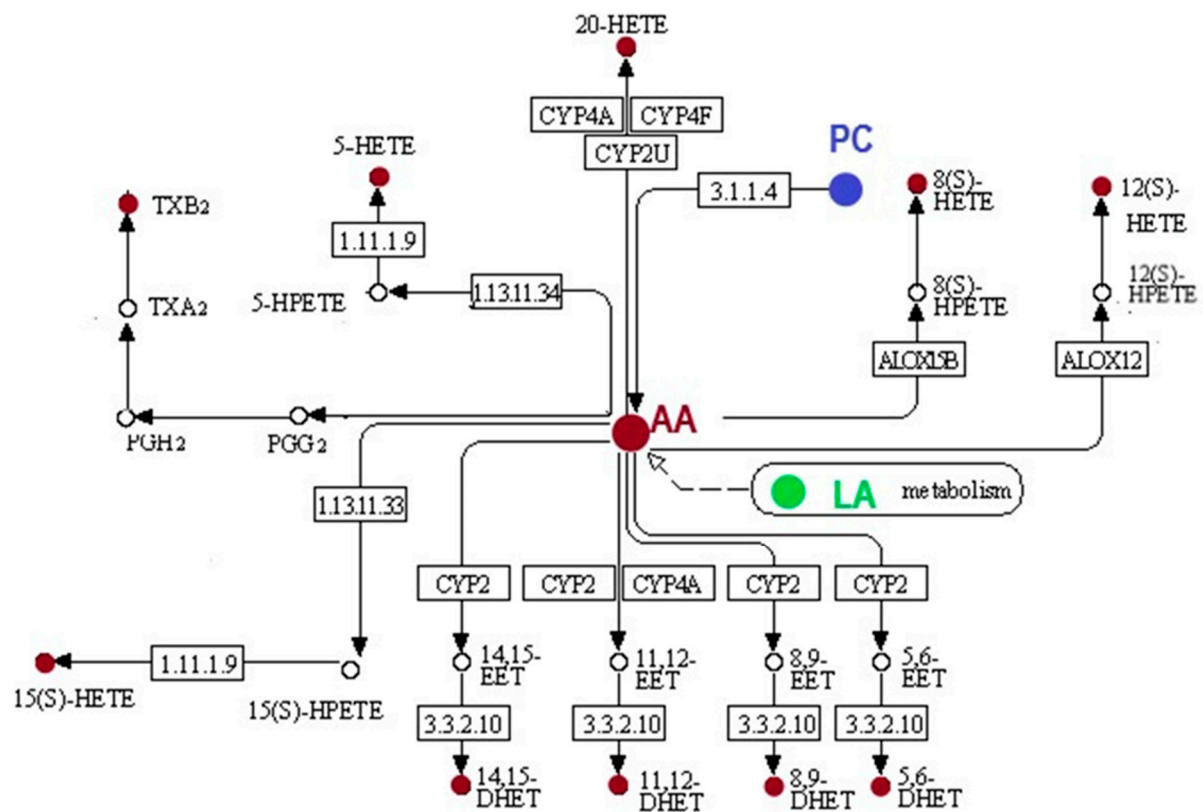

**Figure S1.** Simplified metabolic pathway of arachidonic acid (AA). The figure shows mainly the measured eicosanoids and their metabolic precursors. Phosphatidylcholine (PC) from the plasma membrane is a precursor of AA, and linoleic acid (LA) entry is also displayed. The map was downloaded from <https://www.genome.jp/pathway/map00590> and simplified.



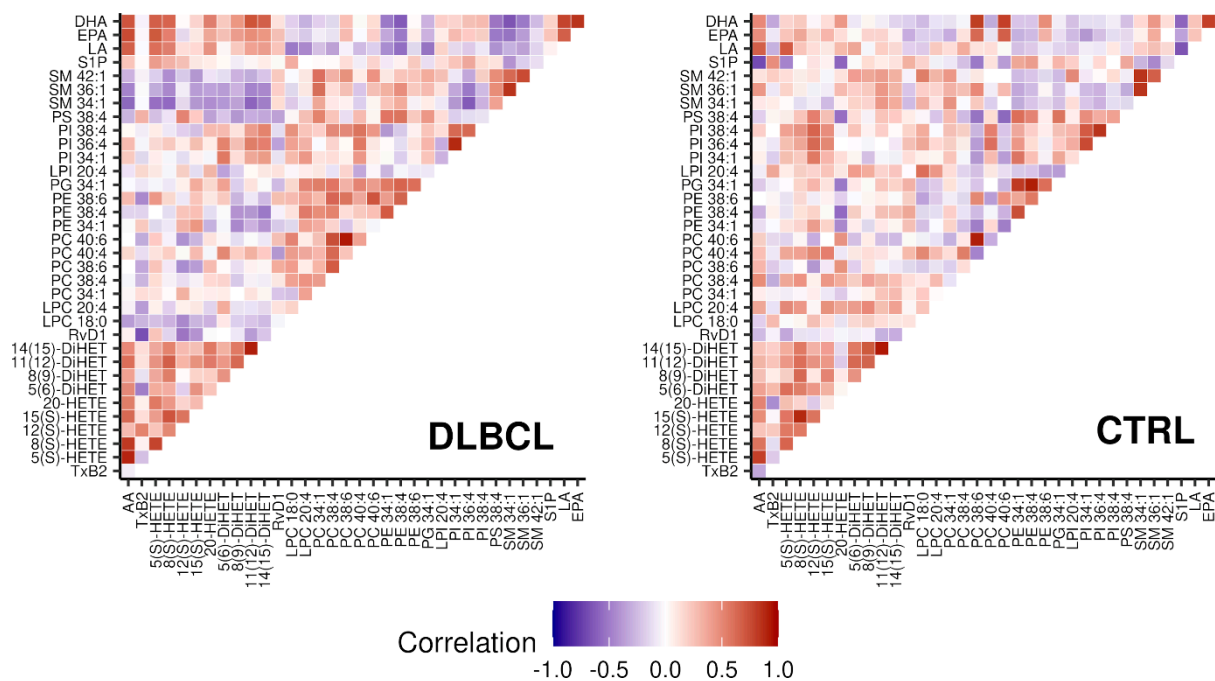

**Figure S2.** Heatmaps by Spearman correlation coefficients between pairs of lipid species in DLBCL and CTRL group. The rows and columns represent the lipid species. The magnitude of correlation is proportional to the colour intensity.
