# Supplementary material for: Disturbed Plasma Lipidomic Profiles in Females with Diffuse Large B-Cell Lymphoma: A Pilot Study
Source: MDPI journal article supplement (doi:10.3390/cancers15143653), 2023-07-18
Supplement: s1 [file s1]

## **SUPPLEMENTARY FILE 1**

**For the manuscript:**

### **DISTURBED PLASMA LIPIDOMIC PROFILES IN FEMALES WITH DIFFUSE LARGE B-CELL LYMPHOMA: A PILOT STUDY**

Romana Masnikosa<sup>1\*</sup>, David Pirić<sup>1</sup>, Julia Maria Post<sup>2</sup>, Zorica Cvetković<sup>3,4</sup>, Snježana Petrović<sup>5</sup>,  
Marija Paunović<sup>5</sup>, Vesna Vučić<sup>5</sup>, Laura Bindila<sup>2\*</sup>

1 Department of Physical Chemistry, Vinca Institute of Nuclear Sciences - National Institute of the Republic of Serbia, University of Belgrade, Mike Petrovica Alasa 12-14, 11001 Belgrade, Republic of Serbia

2 Clinical Lipidomics Unit, Institute of Physiological Chemistry, University Medical Center, Duesbergweg 6, 55128 Mainz, Germany

3 Department of Haematology, Clinical Hospital Center Zemun, Vukova 9, 11080 Belgrade, Republic of Serbia

4 Faculty of Medicine, University of Belgrade, Dr Subotica 8, 11000 Belgrade, Republic of Serbia

5 Group for Nutritional Biochemistry and Dietology, Centre of Research Excellence in Nutrition and Metabolism, Institute for Medical Research, National Institute of the Republic of Serbia, University of Belgrade, Tadeusa Kosciuska 1, 11000 Belgrade, Republic of Serbia

\*Corresponding authors: Dr Laura Bindila. email: [bindila@uni-mainz.de](mailto:bindila@uni-mainz.de) phone: +4961313925794, fax: +4961313923536, and dr Romana Masnikosa, e-mail: [romana@vin.bg.ac.rs](mailto:romana@vin.bg.ac.rs), phone +38162436343

**Table S1.** Plasma lipid species measured by the untargeted lipidomics (semi-quantification)

| Abbreviation | Lipid species                                                  | Mean conc. (nmol/mL) |
|--------------|----------------------------------------------------------------|----------------------|
| PC 14:0_18:2 | 1-tetradecanoyl-2-octadecadienoyl-sn-glycero-3-phosphocholine  | 6.830                |
| PC 14:0_20:4 | 1-tetradecanoyl-2-eicosatetraenoyl-sn-glycero-3-phosphocholine | 2.392                |
| PC 14:0_22:6 | 1-tetradecanoyl-2-docosahexaenoyl-sn-glycero-3-phosphocholine  | 0.851                |
| PC 15:0_16:0 | 1-pentadecanoyl-2-hexadecanoyl-sn-glycero-3-phosphocholine     | 1.264                |
| PC 15:0_20:4 | 1-pentadecanoyl-2-eicosatetraenoyl-sn-glycero-3-phosphocholine | 1.892                |
| PC 16:0_14:0 | 1-hexadecanoyl-2-tetradecanoyl-sn-glycero-3-phosphocholine     | 4.429                |
| PC 16:0_16:0 | 1-hexadecanoyl-2-hexadecanoyl-sn-glycero-3-phosphocholine      | 26.513               |
| PC 16:0_18:1 | 1-hexadecanoyl-2-octadecenoyl-sn-glycero-3-phosphocholine      | 283.179              |
| PC 16:0_18:2 | 1-hexadecanoyl-2-octadecadienoyl-sn-glycero-3-phosphocholine   | 555.483              |
| PC 16:0_20:4 | 1-hexadecanoyl-2-eicosatetraenoyl-sn-glycero-3-phosphocholine  | 223.120              |
| PC 16:0_20:5 | 1-hexadecanoyl-2-eicosapentaenoyl-sn-glycero-3-phosphocholine  | 15.352               |
| PC 16:0_22:6 | 1-hexadecanoyl-2-docosahexaenoyl-sn-glycero-3-phosphocholine   | 75.234               |
| PC 16:1_18:2 | 1-hexadecenoyl-2-octadecadienoyl-sn-glycero-3-phosphocholine   | 12.248               |
| PC 16:1_22:6 | 1-hexadecenoyl-2-docosahexaenoyl-sn-glycero-3-phosphocholine   | 0.685                |
| PC 17:0_14:1 | 1-heptadecanoyl-2-tetradecenoyl-sn-glycero-3-phosphocholine    | 0.214                |
| PC 17:0_18:1 | 1-heptadecanoyl-2-octadecenoyl-sn-glycero-3-phosphocholine     | 4.079                |
| PC 17:0_18:2 | 1-heptadecanoyl-2-octadecadienoyl-sn-glycero-3-phosphocholine  | 11.747               |
| PC 17:0_20:4 | 1-heptadecanoyl-2-eicosatetraenoyl-sn-glycero-3-phosphocholine | 5.828                |
| PC 17:0_22:6 | 1-heptadecanoyl-2-docosahexaenoyl-sn-glycero-3-phosphocholine  | 1.630                |
| PC 17:1_18:2 | 1-heptadecenoyl-2-octadecadienoyl-sn-glycero-3-phosphocholine  | 1.593                |
| PC 17:1_20:4 | 1-heptadecenoyl-2-eicosatetraenoyl-sn-glycero-3-phosphocholine | 0.698                |
| PC 18:0_16:0 | 1-octadecanoyl-2-hexadecanoyl-sn-glycero-3-phosphocholine      | 4.285                |
| PC 18:0_18:1 | 1-octadecanoyl-2-octadecenoyl-sn-glycero-3-phosphocholine      | 50.685               |
| PC 18:0_18:2 | 1-octadecanoyl-2-octadecadienoyl-sn-glycero-3-phosphocholine   | 366.417              |

|                |                                                                   |         |
|----------------|-------------------------------------------------------------------|---------|
| PC 18:0_20:2   | 1-octadecanoyl-2-eicosadienoyl-sn-glycero-3-phosphocholine        | 7.034   |
| PC 18:0_20:4   | 1-octadecanoyl-2-eicosatetraenoyl-sn-glycero-3-phosphocholine     | 151.117 |
| PC 18:0_22:4   | 1-octadecanoyl-2-docosatetraenoyl-sn-glycero-3-phosphocholine     | 5.842   |
| PC 18:0_22:5   | 1-octadecanoyl-2-docosapentaenoyl-sn-glycero-3-phosphocholine     | 4.356   |
| PC 18:0_22:6   | 1-octadecanoyl-2-docosahexaenoyl-sn-glycero-3-phosphocholine      | 32.360  |
| PC 18:1_18:2   | 1-hexadecenoyl-2-octadecadienoyl-sn-glycero-3-phosphocholine      | 153.268 |
| PC 18:1_20:4   | 1-hexadecenoyl-2-eicosatetraenoyl-sn-glycero-3-phosphocholine     | 40.709  |
| PC 18:2_18:2   | 1-octadecadienoyl-2-octadecadienoyl-sn-glycero-3-phosphocholine   | 33.617  |
| PC 18:2_20:4   | 1-octadecadienoyl-2-eicosatetraenoyl-sn-glycero-3-phosphocholine  | 11.325  |
| PC 19:0_18:2   | 1-nonadecanoyl-2-octadecadienoyl-sn-glycero-3-phosphocholine      | 2.010   |
| PC 20:1_18:2   | 1-eicosenoyl-2-octadecadienoyl-sn-glycero-3-phosphocholine        | 43.740  |
| PC 20:2_20:4   | 1-eicosadienoyl-2-eicosatetraenoyl-sn-glycero-3-phosphocholine    | 2.305   |
| PC 20:4_20:4   | 1-eicosatetraenoyl-2-eicosatetraenoyl-sn-glycero-3-phosphocholine | 1.260   |
| PC O-18:1_20:4 | 1-octadecenyl-2-eicosatetraenoyl-sn-glycero-3-phosphocholine      | 0.232   |
| PC O-20:1_20:4 | 1-eicosenyl-2-eicosatetraenoyl-sn-glycero-3-phosphocholine        | 0.274   |
| LPC 14:0       | tetradecanoyl-sn-glycero-3-phosphocholine                         | 0.526   |
| LPC 15:0 sn-1  | 1-pentadecanoyl-sn-glycero-3-phosphocholine                       | 0.287   |
| LPC 16:0 sn-1  | 1-hexadecanoyl-sn-glycero-3-phosphocholine                        | 47.545  |
| LPC 18:0 sn-1  | 1-octadecanoyl-sn-glycero-3-phosphocholine                        | 21.091  |
| LPC 18:1 sn-1  | 1-octadecenoyl-sn-glycero-3-phosphocholine                        | 10.672  |
| LPC 18:2 sn-1  | 1-octadecadienoyl-sn-glycero-3-phosphocholine                     | 17.625  |
| LPC 18:3       | octadecatrienoyl-sn-glycero-3-phosphocholine                      | 0.169   |
| LPC 19:0       | nonadecanoyl-sn-glycero-3-phosphocholine                          | 0.107   |
| LPC 20:4 sn-1  | 1-eicosatetraenoyl-sn-glycero-3-phosphocholine                    | 3.834   |
| LPC 20:4 sn-2  | 2-eicosatetraenoyl-sn-glycero-3-phosphocholine                    | 1.042   |
| LPC 20:5       | eicosapentaenoyl-sn-glycero-3-phosphocholine                      | 0.206   |
| LPC 22:5 sn-1  | 1-docosapentaenoyl-sn-glycero-3-phosphocholine                    | 0.177   |
| LPC 22:6 sn-1  | 1-docosahexaenoyl-sn-glycero-3-phosphocholine                     | 0.761   |
| LPC 22:6 sn-2  | 2-docosahexaenoyl-sn-glycero-3-phosphocholine                     | 0.226   |
| LPC 24:0       | tetracosanoyl-sn-glycero-3-phosphocholine                         | 0.090   |
| SM 34:0;O3     |                                                                   | 0.421   |
| SM 34:1;O3     | N-(2-hydroxyhexadecanoyl)-sphing-4-enine-1-phosphocholine         | 0.978   |
| SM d18:1_16:0  | N-(hexadecanoyl)-sphing-4-enine-1-phosphocholine                  | 130.852 |
| SM d18:1_16:1  | N-(hexadecenoyl)-sphing-4-enine-1-phosphocholine                  | 23.672  |
| SM d18:1_18:0  | N-(octadecanoyl)-sphing-4-enine-1-phosphocholine                  | 27.574  |
| SM d18:1_18:1  | N-(octadecenoyl)-sphing-4-enine-1-phosphocholine                  | 15.976  |

|                  |                                                                    |        |
|------------------|--------------------------------------------------------------------|--------|
| SM d18:1_24:0    | N-(tetracosanoyl)-sphing-4-enine-1-phosphocholine                  | 29.010 |
| SM d18:1_24:1    | N-(tetracosenoyl)-sphing-4-enine-1-phosphocholine                  | 55.995 |
| SM d24:2_14:0    | N-(tetradecanoyl)-tetracosasphingadienine-1-phosphocholine         | 8.672  |
| SM d32:1         | Sphingomyelin d32:1                                                | 15.130 |
| SM d32:2         | Sphingomyelin d32:2                                                | 1.341  |
| SM d33:1         | Sphingomyelin d33:1                                                | 9.186  |
| SM d34:0         | Sphingomyelin d34:0                                                | 6.949  |
| SM d35:1         | Sphingomyelin d35:1                                                | 1.023  |
| SM d35:2         | Sphingomyelin d35:2                                                | 0.751  |
| SM d36:3         | Sphingomyelin d36:3                                                | 0.802  |
| SM d38:1         | Sphingomyelin d38:1                                                | 18.346 |
| SM d38:3         | Sphingomyelin d38:3                                                | 0.488  |
| SM d39:1         | Sphingomyelin d39:1                                                | 7.497  |
| SM d40:1         | Sphingomyelin d40:1                                                | 45.635 |
| SM d40:2         | Sphingomyelin d40:2                                                | 5.128  |
| SM d40:3         | Sphingomyelin d40:3                                                | 2.183  |
| SM d41:1         | Sphingomyelin d41:1                                                | 19.162 |
| SM d41:2         | Sphingomyelin d41:2                                                | 0.638  |
| SM d41:3         | Sphingomyelin d41:3                                                | 1.270  |
| SM d44:2         | Sphingomyelin d44:2                                                | 0.419  |
| SM d44:3         | Sphingomyelin d44:3                                                | 0.595  |
| Cer 18:2;O2/24:1 | Ceramide 18:2;O2/24:1                                              | 1.968  |
| Cer d18:1_16:0   | N-(hexadecanoyl)-sphing-4-enine                                    | 1.834  |
| Cer d18:1_20:0   | N-(eicosanoyl)-sphing-4-enine                                      | 1.143  |
| Cer d18:1_22:0   | N-(docosanoyl)-sphing-4-enine                                      | 5.807  |
| Cer d18:1_24:0   | N-(tetracosanoyl)-sphing-4-enine                                   | 18.089 |
| Cer d18:1_24:1   | N-(tetracosenoyl)-sphing-4-enine                                   | 7.072  |
| Cer d40:2        | Ceramide d40:2                                                     | 1.475  |
| Cer d41:1        | Ceramide d41:1                                                     | 4.846  |
| Cer d43:1        | Ceramide d43:1                                                     | 3.065  |
| Cer d43:2        | Ceramide d43:2                                                     | 0.606  |
| Cer d44:1        | Ceramide d44:1                                                     | 0.806  |
| PE 16:0_18:1     | 1-hexadecanoyl-2-octadecenoyl-sn-glycero-3-phosphoethanolamine     | 0.995  |
| PE 16:0_18:2     | 1-hexadecanoyl-2-octadecadienoyl-sn-glycero-3-phosphoethanolamine  | 1.983  |
| PE 16:0_20:4     | 1-hexadecanoyl-2-eicosatetraenoyl-sn-glycero-3-phosphoethanolamine | 2.708  |
| PE 16:0_22:6     | 1-hexadecanoyl-2-docosahexaenoyl-sn-glycero-3-phosphoethanolamine  | 2.790  |

|                |                                                                       |       |
|----------------|-----------------------------------------------------------------------|-------|
| PE 18:0_18:1   | 1-octadecanoyl-2-octadecenoyl-sn-glycero-3-phosphoethanolamine        | 2.767 |
| PE 18:0_18:2   | 1-octadecanoyl-2-octadecadienoyl-sn-glycero-3-phosphoethanolamine     | 4.104 |
| PE 18:0_20:3   | 1-octadecanoyl-2-eicosatrienoyl-sn-glycero-3-phosphoethanolamine      | 0.443 |
| PE 18:0_20:4   | 1-octadecanoyl-2-eicosatetraenoyl-sn-glycero-3-phosphoethanolamine    | 7.051 |
| PE 18:0_22:6   | 1-octadecanoyl-2-docosahexaenoyl-sn-glycero-3-phosphoethanolamine     | 1.731 |
| PE 18:1_18:2   | 1-octadecenoyl-2-octadecadienoyl-sn-glycero-3-phosphoethanolamine     | 1.002 |
| PE 18:1_20:4   | 1-octadecenoyl-2-eicosatetraenoyl-sn-glycero-3-phosphoethanolamine    | 1.118 |
| PE 18:2_18:2   | 1-octadecenoyl-2-octadecenoyl-sn-glycero-3-phosphoethanolamine        | 0.178 |
| PE 18:2_20:4   | 1-octadecenoyl-2-eicosatetraenoyl-sn-glycero-3-phosphoethanolamine    | 0.164 |
| PE O-16:1_18:1 | 1-hexadecenyl-2-octadecenoyl-sn-glycero-3-phosphoethanolamine         | 0.779 |
| PE O-16:1_18:2 | 1-hexadecenyl-2-octadecadienoyl-sn-glycero-3-phosphoethanolamine      | 1.577 |
| PE O-16:1_20:4 | eicosatetraenoyl-sn-glycero-3-phosphoethanolamine                     | 5.236 |
| PE O-16:1_22:6 | 1-hexadecenyl-2-docosahexaenoyl-sn-glycero-3-phosphoethanolamine      | 2.577 |
| PE O-17:1_18:2 | 1-heptadecenyl-2-octadecadienoyl-sn-glycero-3-phosphoethanolamine     | 0.200 |
| PE O-17:1_20:4 | 1-heptadecenyl-2-eicosatetraenoyl-sn-glycero-3-phosphoethanolamine    | 0.462 |
| PE O-17:1_22:6 | 1-heptadecenyl-2-docosahexaenoyl-sn-glycero-3-phosphoethanolamine     | 0.201 |
| PE O-18:1_20:1 | 1-octadecenyl-2-eicosenoyl-sn-glycero-3-phosphoethanolamine           | 0.168 |
| PE O-18:1_20:3 | 1-octadecenyl-2-eicosatrienoyl-sn-glycero-3-phosphoethanolamine       | 0.671 |
| PE O-18:1_20:5 | 1-octadecenyl-2-eicosapentaenoyl-sn-glycero-3-phosphoethanolamine     | 1.133 |
| PE O-18:1_22:4 | 1-octadecenyl-2-docosatetraenoyl-sn-glycero-3-phosphoethanolamine     | 0.370 |
| PE O-18:2_20:4 | 1-octadecadienyl-2-eicosatetraenoyl-sn-glycero-3-phosphoethanolamine  | 3.895 |
| PE O-18:2_22:6 | 1-octadecadienyl-2-docosahexaenoyl-sn-glycero-3-phosphoethanolamine   | 1.534 |
| PE O-18:3_20:4 | 1-octadecatrienyl-2-eicosatetraenoyl-sn-glycero-3-phosphoethanolamine | 0.413 |
| PE O-20:1_18:2 | 1-eicosenyl-2-octadecadienoyl-sn-glycero-3-phosphoethanolamine        | 0.367 |
| PE O-20:1_20:4 | 1-eicosenyl-2-eicosatetraenoyl-sn-glycero-3-phosphoethanolamine       | 0.768 |
| PE O-20:2_22:6 | 1-eicosadienyl-2-docosahexaenoyl-sn-glycero-3-phosphoethanolamine     | 0.133 |
| PE O-22:1_20:4 | 1-docosenyl-2-eicosatetraenoyl-sn-glycero-3-phosphoethanolamine       | 0.148 |
| PE O-22:2_20:4 | 1-docosadienyl-2-eicosatetraenoyl-sn-glycero-3-phosphoethanolamine    | 0.259 |
| PE O-24:2_20:4 | 1-tetracosadienyl-2-eicosatetraenoyl-sn-glycero-3-phosphoethanolamine | 0.195 |
| LPE 16:0 sn-1  | 1-hexadecanoyl-sn-glycero-3-phosphoethanolamine                       | 2.950 |
| LPE 16:0 sn-2  | 2-hexadecanoyl-sn-glycero-3-phosphoethanolamine                       | 0.687 |
| LPE 18:0 sn-1  | 1-octadecanoyl-sn-glycero-3-phosphoethanolamine                       | 3.790 |
| LPE 18:0 sn-2  | 2-octadecanoyl-sn-glycero-3-phosphoethanolamine                       | 0.578 |
| LPE 18:1 sn-1  | 1-octadecenoyl-sn-glycero-3-phosphoethanolamine                       | 2.512 |
| LPE 18:2 sn-1  | 1-octadecadienoyl-sn-glycero-3-phosphoethanolamine                    | 5.397 |
| LPE 18:2 sn-2  | 2-octadecadienoyl-sn-glycero-3-phosphoethanolamine                    | 1.322 |

|               |                                                                |        |
|---------------|----------------------------------------------------------------|--------|
| LPE 20:4 sn-1 | 1-eicosatetraenoyl-sn-glycero-3-phosphoethanolamine            | 2.213  |
| LPE 20:4 sn-2 | 2-eicosatetraenoyl-sn-glycero-3-phosphoethanolamine            | 4.294  |
| LPE 22:5      | docosapentaenoyl-sn-glycero-3-phosphoethanolamine              | 0.377  |
| LPE 22:6 sn-1 | 1-docosahexaenoyl-sn-glycero-3-phosphoethanolamine             | 2.673  |
| LPE 22:6 sn-2 | 2-docosahexaenoyl-sn-glycero-3-phosphoethanolamine             | 1.223  |
| LPE O-18:1    | octadecenyl-sn-glycero-3-phosphoethanolamine                   | 0.539  |
| PI 16:0_16:0  | 1-hexadecanoyl-2-hexadecanoyl-sn-glycero-3-phosphoinositol     | 0.315  |
| PI 16:0_16:1  | 1-hexadecanoyl-2-hexadecenoyl-sn-glycero-3-phosphoinositol     | 0.417  |
| PI 16:0_18:1  | 1-hexadecanoyl-2-octadecenoyl-sn-glycero-3-phosphoinositol     | 2.018  |
| PI 16:0_18:2  | 1-hexadecanoyl-2-octadecadienoyl-sn-glycero-3-phosphoinositol  | 3.821  |
| PI 16:0_20:4  | 1-hexadecanoyl-2-eicosatetraenoyl-sn-glycero-3-phosphoinositol | 3.556  |
| PI 18:0_18:1  | 1-octadecanoyl-2-octadecenoyl-sn-glycero-3-phosphoinositol     | 1.811  |
| PI 18:0_18:2  | 1-octadecanoyl-2-octadecadienoyl-sn-glycero-3-phosphoinositol  | 8.838  |
| PI 18:0_20:3  | 1-octadecanoyl-2-eicosatrienoyl-sn-glycero-3-phosphoinositol   | 2.108  |
| PI 18:0_20:4  | 1-octadecanoyl-2-eicosatetraenoyl-sn-glycero-3-phosphoinositol | 28.602 |
| PI 18:0_22:4  | 1-octadecanoyl-2-docosatetraenoyl-sn-glycero-3-phosphoinositol | 0.285  |
| PI 18:0_22:5  | 1-octadecanoyl-2-docosapentaenoyl-sn-glycero-3-phosphoinositol | 0.583  |
| PI 18:0_22:6  | 1-octadecanoyl-2-docosahexaenoyl-sn-glycero-3-phosphoinositol  | 1.036  |
| PI 18:1_18:2  | 1-octadecenoyl-2-octadecadienoyl-sn-glycero-3-phosphoinositol  | 1.405  |
| PI 18:1_20:4  | 1-octadecenoyl-2-eicosatetraenoyl-sn-glycero-3-phosphoinositol | 0.955  |
| PS 18:0_18:0  | 1-octadecanoyl-2-octadecanoyl-sn-glycero-3-phosphoserine       | 0.955  |
| PS 18:0_18:1  | 1-octadecanoyl-2-octadecenoyl-sn-glycero-3-phosphoserine       | 1.464  |
| PS 18:0_20:4  | 1-octadecanoyl-2-eicosatetraenoyl-sn-glycero-3-phosphoserine   | 0.099  |

Lipid species were measured in plasma samples of diffuse large B-cell lymphoma (DLBCL) patients and controls individuals (CTRL). Mean concentration (mean conc.) for all analytes was calculated (17 DLBCL + 21CTRL).

**Table S2.** The summary of the principal component analysis (PCA) of the lipid dataset obtained through the untargeted lipidomics (38 x155)

| <b>Principal component</b>            | <b>PC1</b> | <b>PC2</b> | <b>PC3</b> | <b>PC4</b> | <b>PC5</b> | <b>PC6</b> | <b>PC7</b> |
|---------------------------------------|------------|------------|------------|------------|------------|------------|------------|
| Eigenvalue                            | 42.99      | 16.35      | 12.62      | 10.28      | 8.78       | 7.59       | 6.80       |
| Proportion of variance (%)            | 27.74      | 10.55      | 8.15       | 6.63       | 5.66       | 4.89       | 4.39       |
| Cumulative proportion of variance (%) | 27.74      | 38.28      | 46.43      | 53.06      | 58.72      | 63.61      | 68.00      |

**Table S3.** Summary of OPLS-DA model built from the lipid dataset obtained through the untargeted lipidomics (38 x 155)

| OPLS-DA model                | Model characteristics |
|------------------------------|-----------------------|
| samples                      | 38                    |
| X variables                  | 155                   |
| excluded_X_variables         | 0                     |
| Y_variables                  | 1                     |
| missing_values               | 0 (0%)                |
| R2X(cum)                     | 0.362                 |
| R2Y(cum)                     | 0.758                 |
| Q2(cum)                      | 0.513                 |
| RMSEE                        | 0.255                 |
| # correctly classified DLBCL | 16/17                 |
| # correctly classified CTRL  | 21/21                 |
| Fischer's probability        | $7.6 \times 10^{-10}$ |
| CV-ANOVA of the model        |                       |
| F-value                      | 8.685                 |
| SD                           | 2.178                 |
| p-value                      | $6.64 \times 10^{-5}$ |

**Table S4.** VIP values from the OPLS-DA model built from the 38 x 155 lipid dataset (lipid species with VIP > 1 are shown)

| <b>Lipid species</b> | <b>VIP value</b> |
|----------------------|------------------|
| PC 18:2_18:2         | 2.250            |
| PI 18:1_18:2         | 2.044            |
| PE 18:0_18:1         | 2.010            |
| PC 18:0_18:2         | 1.977            |
| PC 18:2_20:4         | 1.936            |
| LPE 18:2 sn-2        | 1.929            |
| PE O-16:1_18:1       | 1.905            |
| PE O-16:1_18:2       | 1.904            |
| LPC 18:2 sn-1        | 1.838            |
| Cer d18:1_24:1       | 1.818            |
| Cer d44:1            | 1.808            |
| PI 18:0_18:1         | 1.799            |
| PS 18:0_18:1         | 1.734            |
| PE O-17:1_18:2       | 1.664            |
| PC 14:0_18:2         | 1.636            |
| PI 18:1_20:4         | 1.626            |
| PE O-20:1_18:2       | 1.616            |
| PC 16:1_18:2         | 1.610            |
| PC O-18:1_20:4       | 1.600            |
| LPE 18:2 sn-1        | 1.566            |
| SM d39:1             | 1.536            |
| PC 18:1_18:2         | 1.512            |
| PC 17:0_18:2         | 1.500            |
| PC 16:0_18:2         | 1.470            |
| SM d38:1             | 1.428            |
| PI 16:0_18:1         | 1.409            |
| SM d32:2             | 1.408            |
| SM d32:1             | 1.382            |
| PC 17:1_18:2         | 1.367            |
| PI 16:0_18:2         | 1.346            |
| Cer d40:2            | 1.338            |
| PC 14:0_20:4         | 1.330            |
| SM 34:0;3O           | 1.314            |
| SM d44:2             | 1.303            |
| PE O-18:3_20:4       | 1.251            |
| PI 18:0_18:2         | 1.247            |
| PE O-18:2_20:4       | 1.246            |
| PC 20:4_20:4         | 1.242            |
| PE O-17:1_20:4       | 1.224            |
| PE O-16:1_20:4       | 1.221            |



|                |       |
|----------------|-------|
| LPE 18:1 sn-1  | 1.207 |
| PC 18:0_18:1   | 1.204 |
| LPE 22:5       | 1.184 |
| PE 18:0_22:6   | 1.178 |
| Cer d18:1_16:0 | 1.176 |
| Cer d43:2      | 1.176 |
| SM d33:1       | 1.154 |
| SM d18:1_18:0  | 1.142 |
| PE 16:0_20:4   | 1.120 |
| SM d18:1_24:1  | 1.115 |
| PI 18:0_20:3   | 1.098 |
| PC 19:0_18:2   | 1.083 |
| PS 18:0_20:4   | 1.083 |
| LPC 19:0       | 1.024 |
| PE 18:0_20:4   | 1.003 |
| PE O-17:1_22:6 | 1.001 |

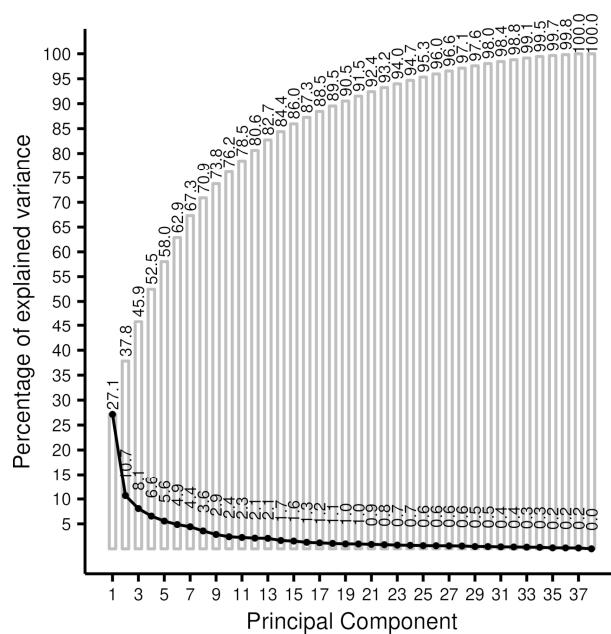

**Figure S1.** Scree plot. Proportion of variance explained by the principal components (black line: individual; grey columns: cumulative variance).
